# Supplementary material
Source: Springer Nature journal article supplement (https://www.springermedizin.de/resource/supplementary/12884_2012_627_MOESM2_ESM.pdf/9458166)
Supplement: MOESM2 [file 9458166]

1  
2 Appendix S2: Confidential Report on Perinatal Death  
3

| NSW MATERNAL AND PERINATAL COMMITTEE<br>CONFIDENTIAL REPORT ON PERINATAL DEATH                                                                                                                                                                                                                                                                                                                                                                                                                                                                                                                                                                                                                                                                                                                                                                                                                                                                                                                                                                                                                                                                                                                                                                                                                                                                                                                                                                                                                                                                                                                                                                                                                                                                                                                                                                                                                                                                                                                                                                                                                                                                                                                                                                                                                                                                                                                                                                                                                                                                                                                       |        |                                                                                                                                                                                                  |                                                                                                                                                                                                                                                                                                                                                                                                                                                                         |  |  |  |  |                                                                                                                                                                                                                                                                                                                                                                                                                                                                                                         |  |  |  |  |                                                                                                                                                                                                                                                                                                                                                                                                                                           |                                                                                                                                                                                                                                                                                                                                                                                                                                                                                                                                                                                                                                                                                                                                                                                                                                                                                                                                                         |                                                                                                                                                                                                                                                                                                                                                                                                                                                                                                                                                                                                                                                                                                                                                                                                                                                                                                                                                                                                                                                                                                                                                                                                                                                                                                                                                                                                                                                                                                                                                                                                   |  |  |  |  |  |                                                                                                                                                                                                                                                                                                                                                                                                                                                                                                                                                                                                                                                                                                              |  |  |  |  |  |  |  |  |  |  |  |  |  |  |  |  |  |  |  |  |  |
|------------------------------------------------------------------------------------------------------------------------------------------------------------------------------------------------------------------------------------------------------------------------------------------------------------------------------------------------------------------------------------------------------------------------------------------------------------------------------------------------------------------------------------------------------------------------------------------------------------------------------------------------------------------------------------------------------------------------------------------------------------------------------------------------------------------------------------------------------------------------------------------------------------------------------------------------------------------------------------------------------------------------------------------------------------------------------------------------------------------------------------------------------------------------------------------------------------------------------------------------------------------------------------------------------------------------------------------------------------------------------------------------------------------------------------------------------------------------------------------------------------------------------------------------------------------------------------------------------------------------------------------------------------------------------------------------------------------------------------------------------------------------------------------------------------------------------------------------------------------------------------------------------------------------------------------------------------------------------------------------------------------------------------------------------------------------------------------------------------------------------------------------------------------------------------------------------------------------------------------------------------------------------------------------------------------------------------------------------------------------------------------------------------------------------------------------------------------------------------------------------------------------------------------------------------------------------------------------------|--------|--------------------------------------------------------------------------------------------------------------------------------------------------------------------------------------------------|-------------------------------------------------------------------------------------------------------------------------------------------------------------------------------------------------------------------------------------------------------------------------------------------------------------------------------------------------------------------------------------------------------------------------------------------------------------------------|--|--|--|--|---------------------------------------------------------------------------------------------------------------------------------------------------------------------------------------------------------------------------------------------------------------------------------------------------------------------------------------------------------------------------------------------------------------------------------------------------------------------------------------------------------|--|--|--|--|-------------------------------------------------------------------------------------------------------------------------------------------------------------------------------------------------------------------------------------------------------------------------------------------------------------------------------------------------------------------------------------------------------------------------------------------|---------------------------------------------------------------------------------------------------------------------------------------------------------------------------------------------------------------------------------------------------------------------------------------------------------------------------------------------------------------------------------------------------------------------------------------------------------------------------------------------------------------------------------------------------------------------------------------------------------------------------------------------------------------------------------------------------------------------------------------------------------------------------------------------------------------------------------------------------------------------------------------------------------------------------------------------------------|---------------------------------------------------------------------------------------------------------------------------------------------------------------------------------------------------------------------------------------------------------------------------------------------------------------------------------------------------------------------------------------------------------------------------------------------------------------------------------------------------------------------------------------------------------------------------------------------------------------------------------------------------------------------------------------------------------------------------------------------------------------------------------------------------------------------------------------------------------------------------------------------------------------------------------------------------------------------------------------------------------------------------------------------------------------------------------------------------------------------------------------------------------------------------------------------------------------------------------------------------------------------------------------------------------------------------------------------------------------------------------------------------------------------------------------------------------------------------------------------------------------------------------------------------------------------------------------------------|--|--|--|--|--|--------------------------------------------------------------------------------------------------------------------------------------------------------------------------------------------------------------------------------------------------------------------------------------------------------------------------------------------------------------------------------------------------------------------------------------------------------------------------------------------------------------------------------------------------------------------------------------------------------------------------------------------------------------------------------------------------------------|--|--|--|--|--|--|--|--|--|--|--|--|--|--|--|--|--|--|--|--|--|
| HOSPITAL: _____                                                                                                                                                                                                                                                                                                                                                                                                                                                                                                                                                                                                                                                                                                                                                                                                                                                                                                                                                                                                                                                                                                                                                                                                                                                                                                                                                                                                                                                                                                                                                                                                                                                                                                                                                                                                                                                                                                                                                                                                                                                                                                                                                                                                                                                                                                                                                                                                                                                                                                                                                                                      |        | Office use: Reference No.: _____                                                                                                                                                                 |                                                                                                                                                                                                                                                                                                                                                                                                                                                                         |  |  |  |  |                                                                                                                                                                                                                                                                                                                                                                                                                                                                                                         |  |  |  |  |                                                                                                                                                                                                                                                                                                                                                                                                                                           |                                                                                                                                                                                                                                                                                                                                                                                                                                                                                                                                                                                                                                                                                                                                                                                                                                                                                                                                                         |                                                                                                                                                                                                                                                                                                                                                                                                                                                                                                                                                                                                                                                                                                                                                                                                                                                                                                                                                                                                                                                                                                                                                                                                                                                                                                                                                                                                                                                                                                                                                                                                   |  |  |  |  |  |                                                                                                                                                                                                                                                                                                                                                                                                                                                                                                                                                                                                                                                                                                              |  |  |  |  |  |  |  |  |  |  |  |  |  |  |  |  |  |  |  |  |  |
| <b>MOTHER DETAILS:</b><br><br>Mother's name: _____<br><br>Address: _____<br><br>Medical Record No.: <table border="1" style="display: inline-table; width: 100px; height: 15px; vertical-align: middle;"> <tr><td> </td><td> </td></tr> </table>                                                                                                                                                                                                                                                                                                                                                                                                                                                                                                                                                                                                                                                                                                                                                                                                                                                                                                                                                                                                                                                                                                                                                                                                                                                                                                                                                                                                                                                                                                                                                                                                                                                                                                                                                                                                                                                                                                                                                                                                                                                                                                                                                                 |        |                                                                                                                                                                                                  |                                                                                                                                                                                                                                                                                                                                                                                                                                                                         |  |  |  |  |                                                                                                                                                                                                                                                                                                                                                                                                                                                                                                         |  |  |  |  |                                                                                                                                                                                                                                                                                                                                                                                                                                           |                                                                                                                                                                                                                                                                                                                                                                                                                                                                                                                                                                                                                                                                                                                                                                                                                                                                                                                                                         |                                                                                                                                                                                                                                                                                                                                                                                                                                                                                                                                                                                                                                                                                                                                                                                                                                                                                                                                                                                                                                                                                                                                                                                                                                                                                                                                                                                                                                                                                                                                                                                                   |  |  |  |  |  | <b>BABY DETAILS:</b><br><br>Baby's name: _____<br><br>Type of perinatal death: Stillbirth <input type="checkbox"/><br>Neonatal death <input type="checkbox"/><br><br>Date of birth/ stillbirth:        /        /<br><br>If liveborn: Date of death:        /        /<br><br>Age at death:                                day(s)        hour(s)<br><br>Medical Record No.: <table border="1" style="display: inline-table; width: 100px; height: 15px; vertical-align: middle;"> <tr><td> </td><td> </td></tr> </table> |  |  |  |  |  |  |  |  |  |  |  |  |  |  |  |  |  |  |  |  |  |
|                                                                                                                                                                                                                                                                                                                                                                                                                                                                                                                                                                                                                                                                                                                                                                                                                                                                                                                                                                                                                                                                                                                                                                                                                                                                                                                                                                                                                                                                                                                                                                                                                                                                                                                                                                                                                                                                                                                                                                                                                                                                                                                                                                                                                                                                                                                                                                                                                                                                                                                                                                                                      |        |                                                                                                                                                                                                  |                                                                                                                                                                                                                                                                                                                                                                                                                                                                         |  |  |  |  |                                                                                                                                                                                                                                                                                                                                                                                                                                                                                                         |  |  |  |  |                                                                                                                                                                                                                                                                                                                                                                                                                                           |                                                                                                                                                                                                                                                                                                                                                                                                                                                                                                                                                                                                                                                                                                                                                                                                                                                                                                                                                         |                                                                                                                                                                                                                                                                                                                                                                                                                                                                                                                                                                                                                                                                                                                                                                                                                                                                                                                                                                                                                                                                                                                                                                                                                                                                                                                                                                                                                                                                                                                                                                                                   |  |  |  |  |  |                                                                                                                                                                                                                                                                                                                                                                                                                                                                                                                                                                                                                                                                                                              |  |  |  |  |  |  |  |  |  |  |  |  |  |  |  |  |  |  |  |  |  |
|                                                                                                                                                                                                                                                                                                                                                                                                                                                                                                                                                                                                                                                                                                                                                                                                                                                                                                                                                                                                                                                                                                                                                                                                                                                                                                                                                                                                                                                                                                                                                                                                                                                                                                                                                                                                                                                                                                                                                                                                                                                                                                                                                                                                                                                                                                                                                                                                                                                                                                                                                                                                      |        |                                                                                                                                                                                                  |                                                                                                                                                                                                                                                                                                                                                                                                                                                                         |  |  |  |  |                                                                                                                                                                                                                                                                                                                                                                                                                                                                                                         |  |  |  |  |                                                                                                                                                                                                                                                                                                                                                                                                                                           |                                                                                                                                                                                                                                                                                                                                                                                                                                                                                                                                                                                                                                                                                                                                                                                                                                                                                                                                                         |                                                                                                                                                                                                                                                                                                                                                                                                                                                                                                                                                                                                                                                                                                                                                                                                                                                                                                                                                                                                                                                                                                                                                                                                                                                                                                                                                                                                                                                                                                                                                                                                   |  |  |  |  |  |                                                                                                                                                                                                                                                                                                                                                                                                                                                                                                                                                                                                                                                                                                              |  |  |  |  |  |  |  |  |  |  |  |  |  |  |  |  |  |  |  |  |  |
| For STILLBIRTHS complete Part A and for NEONATAL DEATHS complete Parts A and B                                                                                                                                                                                                                                                                                                                                                                                                                                                                                                                                                                                                                                                                                                                                                                                                                                                                                                                                                                                                                                                                                                                                                                                                                                                                                                                                                                                                                                                                                                                                                                                                                                                                                                                                                                                                                                                                                                                                                                                                                                                                                                                                                                                                                                                                                                                                                                                                                                                                                                                       |        |                                                                                                                                                                                                  |                                                                                                                                                                                                                                                                                                                                                                                                                                                                         |  |  |  |  |                                                                                                                                                                                                                                                                                                                                                                                                                                                                                                         |  |  |  |  |                                                                                                                                                                                                                                                                                                                                                                                                                                           |                                                                                                                                                                                                                                                                                                                                                                                                                                                                                                                                                                                                                                                                                                                                                                                                                                                                                                                                                         |                                                                                                                                                                                                                                                                                                                                                                                                                                                                                                                                                                                                                                                                                                                                                                                                                                                                                                                                                                                                                                                                                                                                                                                                                                                                                                                                                                                                                                                                                                                                                                                                   |  |  |  |  |  |                                                                                                                                                                                                                                                                                                                                                                                                                                                                                                                                                                                                                                                                                                              |  |  |  |  |  |  |  |  |  |  |  |  |  |  |  |  |  |  |  |  |  |
| <table border="1" style="width: 100%; border-collapse: collapse;"> <thead> <tr> <th style="text-align: center; padding: 2px;">PART A</th> </tr> </thead> <tbody> <tr> <td style="padding: 2px;"> <b>1. Was a postmortem examination carried out?</b><br/>                             Yes <input type="checkbox"/> No <input type="checkbox"/> Unknown <input type="checkbox"/><br/>                             If yes, please include a copy of the report.                         </td> </tr> <tr> <td style="padding: 2px;"> <b>2. Was histopathological examination of the placenta carried out?</b><br/>                             Yes <input type="checkbox"/> No <input type="checkbox"/> Unknown <input type="checkbox"/><br/>                             If yes, please include a copy of the report.<br/><br/>                             If no: Placental weight: <table border="1" style="display: inline-table; width: 40px; height: 15px; vertical-align: middle;"> <tr><td> </td><td> </td><td> </td><td> </td></tr> </table> grams<br/>                             Describe the placental appearance: _____                         </td> </tr> <tr> <td style="padding: 2px;"> <b>3. Is this baby one of a multiple pregnancy (twin, triplet etc)?</b><br/>                             Yes <input type="checkbox"/> No <input type="checkbox"/> Unknown <input type="checkbox"/><br/>                             If yes: Number of babies <table border="1" style="display: inline-table; width: 40px; height: 15px; vertical-align: middle;"> <tr><td> </td><td> </td></tr> </table><br/>                             Birth order <table border="1" style="display: inline-table; width: 40px; height: 15px; vertical-align: middle;"> <tr><td> </td><td> </td></tr> </table> </td> </tr> <tr> <td style="padding: 2px;"> <b>4. Bleeding during pregnancy?</b><br/>                             Yes <input type="checkbox"/> No <input type="checkbox"/> Unknown <input type="checkbox"/><br/>                             If yes: Threatened miscarriage <input type="checkbox"/><br/>                             Placental abruption <input type="checkbox"/><br/>                             Placenta praevia <input type="checkbox"/><br/>                             Vasa praevia <input type="checkbox"/><br/>                             Undetermined <input type="checkbox"/><br/>                             Other <input type="checkbox"/><br/>                             If other, specify: _____                         </td> </tr> </tbody> </table> | PART A | <b>1. Was a postmortem examination carried out?</b><br>Yes <input type="checkbox"/> No <input type="checkbox"/> Unknown <input type="checkbox"/><br>If yes, please include a copy of the report. | <b>2. Was histopathological examination of the placenta carried out?</b><br>Yes <input type="checkbox"/> No <input type="checkbox"/> Unknown <input type="checkbox"/><br>If yes, please include a copy of the report.<br><br>If no: Placental weight: <table border="1" style="display: inline-table; width: 40px; height: 15px; vertical-align: middle;"> <tr><td> </td><td> </td><td> </td><td> </td></tr> </table> grams<br>Describe the placental appearance: _____ |  |  |  |  | <b>3. Is this baby one of a multiple pregnancy (twin, triplet etc)?</b><br>Yes <input type="checkbox"/> No <input type="checkbox"/> Unknown <input type="checkbox"/><br>If yes: Number of babies <table border="1" style="display: inline-table; width: 40px; height: 15px; vertical-align: middle;"> <tr><td> </td><td> </td></tr> </table><br>Birth order <table border="1" style="display: inline-table; width: 40px; height: 15px; vertical-align: middle;"> <tr><td> </td><td> </td></tr> </table> |  |  |  |  | <b>4. Bleeding during pregnancy?</b><br>Yes <input type="checkbox"/> No <input type="checkbox"/> Unknown <input type="checkbox"/><br>If yes: Threatened miscarriage <input type="checkbox"/><br>Placental abruption <input type="checkbox"/><br>Placenta praevia <input type="checkbox"/><br>Vasa praevia <input type="checkbox"/><br>Undetermined <input type="checkbox"/><br>Other <input type="checkbox"/><br>If other, specify: _____ | <b>5. Was hypertension present?</b><br>Yes <input type="checkbox"/> No <input type="checkbox"/> Unknown <input type="checkbox"/><br>If yes: Chronic hypertension:<br>Essential <input type="checkbox"/><br>Secondary eg renal disease <input type="checkbox"/><br>Unspecified <input type="checkbox"/><br>Gestational hypertension <input type="checkbox"/><br>Pre-eclampsia <input type="checkbox"/><br>Chronic + superimposed pre-eclampsia <input type="checkbox"/><br>Unspecified <input type="checkbox"/><br><br><b>6. Any other maternal diseases present in pregnancy?</b><br>Yes <input type="checkbox"/> No <input type="checkbox"/> Unknown <input type="checkbox"/><br>If yes: Maternal injury:<br>Accidental <input type="checkbox"/><br>Non-accidental <input type="checkbox"/><br>Diabetes/gestational diabetes <input type="checkbox"/><br>Sepsis <input type="checkbox"/><br>Other <input type="checkbox"/><br>If other, specify: _____ | <b>10. Was there spontaneous preterm delivery (less than 37 weeks)?</b><br>Yes <input type="checkbox"/> No <input type="checkbox"/> Unknown <input type="checkbox"/><br>If yes, what was the duration of rupture of membranes prior to delivery?<br>Less than 24 hours <input type="checkbox"/><br>24 hours or more <input type="checkbox"/><br>Unknown <input type="checkbox"/><br><br><b>11. Was there intrapartum asphyxia?</b><br>Yes <input type="checkbox"/> No <input type="checkbox"/> Unknown <input type="checkbox"/><br><br><b>12. Gestational age:</b> <table border="1" style="display: inline-table; width: 40px; height: 15px; vertical-align: middle;"> <tr><td> </td><td> </td></tr> </table> weeks<br><br><b>13. Birthweight:</b> <table border="1" style="display: inline-table; width: 60px; height: 15px; vertical-align: middle;"> <tr><td> </td><td> </td><td> </td><td> </td><td> </td><td> </td></tr> </table> grams<br><br><b>14. Sex:</b> Male <input type="checkbox"/><br>Female <input type="checkbox"/><br>Indeterminate <input type="checkbox"/><br><br><b>15. Onset of labour:</b><br>Spontaneous <input type="checkbox"/><br>Induced <input type="checkbox"/><br>No labour <input type="checkbox"/><br><br><b>16. Type of delivery:</b><br>Normal vaginal delivery <input type="checkbox"/><br>Breech delivery <input type="checkbox"/><br>Caesarean section <input type="checkbox"/><br>Forceps delivery <input type="checkbox"/><br>Ventouse delivery <input type="checkbox"/><br>Other delivery <input type="checkbox"/><br>If other delivery, specify: _____ |  |  |  |  |  |                                                                                                                                                                                                                                                                                                                                                                                                                                                                                                                                                                                                                                                                                                              |  |  |  |  |  |  |  |  |  |  |  |  |  |  |  |  |  |  |  |  |  |
| PART A                                                                                                                                                                                                                                                                                                                                                                                                                                                                                                                                                                                                                                                                                                                                                                                                                                                                                                                                                                                                                                                                                                                                                                                                                                                                                                                                                                                                                                                                                                                                                                                                                                                                                                                                                                                                                                                                                                                                                                                                                                                                                                                                                                                                                                                                                                                                                                                                                                                                                                                                                                                               |        |                                                                                                                                                                                                  |                                                                                                                                                                                                                                                                                                                                                                                                                                                                         |  |  |  |  |                                                                                                                                                                                                                                                                                                                                                                                                                                                                                                         |  |  |  |  |                                                                                                                                                                                                                                                                                                                                                                                                                                           |                                                                                                                                                                                                                                                                                                                                                                                                                                                                                                                                                                                                                                                                                                                                                                                                                                                                                                                                                         |                                                                                                                                                                                                                                                                                                                                                                                                                                                                                                                                                                                                                                                                                                                                                                                                                                                                                                                                                                                                                                                                                                                                                                                                                                                                                                                                                                                                                                                                                                                                                                                                   |  |  |  |  |  |                                                                                                                                                                                                                                                                                                                                                                                                                                                                                                                                                                                                                                                                                                              |  |  |  |  |  |  |  |  |  |  |  |  |  |  |  |  |  |  |  |  |  |
| <b>1. Was a postmortem examination carried out?</b><br>Yes <input type="checkbox"/> No <input type="checkbox"/> Unknown <input type="checkbox"/><br>If yes, please include a copy of the report.                                                                                                                                                                                                                                                                                                                                                                                                                                                                                                                                                                                                                                                                                                                                                                                                                                                                                                                                                                                                                                                                                                                                                                                                                                                                                                                                                                                                                                                                                                                                                                                                                                                                                                                                                                                                                                                                                                                                                                                                                                                                                                                                                                                                                                                                                                                                                                                                     |        |                                                                                                                                                                                                  |                                                                                                                                                                                                                                                                                                                                                                                                                                                                         |  |  |  |  |                                                                                                                                                                                                                                                                                                                                                                                                                                                                                                         |  |  |  |  |                                                                                                                                                                                                                                                                                                                                                                                                                                           |                                                                                                                                                                                                                                                                                                                                                                                                                                                                                                                                                                                                                                                                                                                                                                                                                                                                                                                                                         |                                                                                                                                                                                                                                                                                                                                                                                                                                                                                                                                                                                                                                                                                                                                                                                                                                                                                                                                                                                                                                                                                                                                                                                                                                                                                                                                                                                                                                                                                                                                                                                                   |  |  |  |  |  |                                                                                                                                                                                                                                                                                                                                                                                                                                                                                                                                                                                                                                                                                                              |  |  |  |  |  |  |  |  |  |  |  |  |  |  |  |  |  |  |  |  |  |
| <b>2. Was histopathological examination of the placenta carried out?</b><br>Yes <input type="checkbox"/> No <input type="checkbox"/> Unknown <input type="checkbox"/><br>If yes, please include a copy of the report.<br><br>If no: Placental weight: <table border="1" style="display: inline-table; width: 40px; height: 15px; vertical-align: middle;"> <tr><td> </td><td> </td><td> </td><td> </td></tr> </table> grams<br>Describe the placental appearance: _____                                                                                                                                                                                                                                                                                                                                                                                                                                                                                                                                                                                                                                                                                                                                                                                                                                                                                                                                                                                                                                                                                                                                                                                                                                                                                                                                                                                                                                                                                                                                                                                                                                                                                                                                                                                                                                                                                                                                                                                                                                                                                                                              |        |                                                                                                                                                                                                  |                                                                                                                                                                                                                                                                                                                                                                                                                                                                         |  |  |  |  |                                                                                                                                                                                                                                                                                                                                                                                                                                                                                                         |  |  |  |  |                                                                                                                                                                                                                                                                                                                                                                                                                                           |                                                                                                                                                                                                                                                                                                                                                                                                                                                                                                                                                                                                                                                                                                                                                                                                                                                                                                                                                         |                                                                                                                                                                                                                                                                                                                                                                                                                                                                                                                                                                                                                                                                                                                                                                                                                                                                                                                                                                                                                                                                                                                                                                                                                                                                                                                                                                                                                                                                                                                                                                                                   |  |  |  |  |  |                                                                                                                                                                                                                                                                                                                                                                                                                                                                                                                                                                                                                                                                                                              |  |  |  |  |  |  |  |  |  |  |  |  |  |  |  |  |  |  |  |  |  |
|                                                                                                                                                                                                                                                                                                                                                                                                                                                                                                                                                                                                                                                                                                                                                                                                                                                                                                                                                                                                                                                                                                                                                                                                                                                                                                                                                                                                                                                                                                                                                                                                                                                                                                                                                                                                                                                                                                                                                                                                                                                                                                                                                                                                                                                                                                                                                                                                                                                                                                                                                                                                      |        |                                                                                                                                                                                                  |                                                                                                                                                                                                                                                                                                                                                                                                                                                                         |  |  |  |  |                                                                                                                                                                                                                                                                                                                                                                                                                                                                                                         |  |  |  |  |                                                                                                                                                                                                                                                                                                                                                                                                                                           |                                                                                                                                                                                                                                                                                                                                                                                                                                                                                                                                                                                                                                                                                                                                                                                                                                                                                                                                                         |                                                                                                                                                                                                                                                                                                                                                                                                                                                                                                                                                                                                                                                                                                                                                                                                                                                                                                                                                                                                                                                                                                                                                                                                                                                                                                                                                                                                                                                                                                                                                                                                   |  |  |  |  |  |                                                                                                                                                                                                                                                                                                                                                                                                                                                                                                                                                                                                                                                                                                              |  |  |  |  |  |  |  |  |  |  |  |  |  |  |  |  |  |  |  |  |  |
| <b>3. Is this baby one of a multiple pregnancy (twin, triplet etc)?</b><br>Yes <input type="checkbox"/> No <input type="checkbox"/> Unknown <input type="checkbox"/><br>If yes: Number of babies <table border="1" style="display: inline-table; width: 40px; height: 15px; vertical-align: middle;"> <tr><td> </td><td> </td></tr> </table><br>Birth order <table border="1" style="display: inline-table; width: 40px; height: 15px; vertical-align: middle;"> <tr><td> </td><td> </td></tr> </table>                                                                                                                                                                                                                                                                                                                                                                                                                                                                                                                                                                                                                                                                                                                                                                                                                                                                                                                                                                                                                                                                                                                                                                                                                                                                                                                                                                                                                                                                                                                                                                                                                                                                                                                                                                                                                                                                                                                                                                                                                                                                                              |        |                                                                                                                                                                                                  |                                                                                                                                                                                                                                                                                                                                                                                                                                                                         |  |  |  |  |                                                                                                                                                                                                                                                                                                                                                                                                                                                                                                         |  |  |  |  |                                                                                                                                                                                                                                                                                                                                                                                                                                           |                                                                                                                                                                                                                                                                                                                                                                                                                                                                                                                                                                                                                                                                                                                                                                                                                                                                                                                                                         |                                                                                                                                                                                                                                                                                                                                                                                                                                                                                                                                                                                                                                                                                                                                                                                                                                                                                                                                                                                                                                                                                                                                                                                                                                                                                                                                                                                                                                                                                                                                                                                                   |  |  |  |  |  |                                                                                                                                                                                                                                                                                                                                                                                                                                                                                                                                                                                                                                                                                                              |  |  |  |  |  |  |  |  |  |  |  |  |  |  |  |  |  |  |  |  |  |
|                                                                                                                                                                                                                                                                                                                                                                                                                                                                                                                                                                                                                                                                                                                                                                                                                                                                                                                                                                                                                                                                                                                                                                                                                                                                                                                                                                                                                                                                                                                                                                                                                                                                                                                                                                                                                                                                                                                                                                                                                                                                                                                                                                                                                                                                                                                                                                                                                                                                                                                                                                                                      |        |                                                                                                                                                                                                  |                                                                                                                                                                                                                                                                                                                                                                                                                                                                         |  |  |  |  |                                                                                                                                                                                                                                                                                                                                                                                                                                                                                                         |  |  |  |  |                                                                                                                                                                                                                                                                                                                                                                                                                                           |                                                                                                                                                                                                                                                                                                                                                                                                                                                                                                                                                                                                                                                                                                                                                                                                                                                                                                                                                         |                                                                                                                                                                                                                                                                                                                                                                                                                                                                                                                                                                                                                                                                                                                                                                                                                                                                                                                                                                                                                                                                                                                                                                                                                                                                                                                                                                                                                                                                                                                                                                                                   |  |  |  |  |  |                                                                                                                                                                                                                                                                                                                                                                                                                                                                                                                                                                                                                                                                                                              |  |  |  |  |  |  |  |  |  |  |  |  |  |  |  |  |  |  |  |  |  |
|                                                                                                                                                                                                                                                                                                                                                                                                                                                                                                                                                                                                                                                                                                                                                                                                                                                                                                                                                                                                                                                                                                                                                                                                                                                                                                                                                                                                                                                                                                                                                                                                                                                                                                                                                                                                                                                                                                                                                                                                                                                                                                                                                                                                                                                                                                                                                                                                                                                                                                                                                                                                      |        |                                                                                                                                                                                                  |                                                                                                                                                                                                                                                                                                                                                                                                                                                                         |  |  |  |  |                                                                                                                                                                                                                                                                                                                                                                                                                                                                                                         |  |  |  |  |                                                                                                                                                                                                                                                                                                                                                                                                                                           |                                                                                                                                                                                                                                                                                                                                                                                                                                                                                                                                                                                                                                                                                                                                                                                                                                                                                                                                                         |                                                                                                                                                                                                                                                                                                                                                                                                                                                                                                                                                                                                                                                                                                                                                                                                                                                                                                                                                                                                                                                                                                                                                                                                                                                                                                                                                                                                                                                                                                                                                                                                   |  |  |  |  |  |                                                                                                                                                                                                                                                                                                                                                                                                                                                                                                                                                                                                                                                                                                              |  |  |  |  |  |  |  |  |  |  |  |  |  |  |  |  |  |  |  |  |  |
| <b>4. Bleeding during pregnancy?</b><br>Yes <input type="checkbox"/> No <input type="checkbox"/> Unknown <input type="checkbox"/><br>If yes: Threatened miscarriage <input type="checkbox"/><br>Placental abruption <input type="checkbox"/><br>Placenta praevia <input type="checkbox"/><br>Vasa praevia <input type="checkbox"/><br>Undetermined <input type="checkbox"/><br>Other <input type="checkbox"/><br>If other, specify: _____                                                                                                                                                                                                                                                                                                                                                                                                                                                                                                                                                                                                                                                                                                                                                                                                                                                                                                                                                                                                                                                                                                                                                                                                                                                                                                                                                                                                                                                                                                                                                                                                                                                                                                                                                                                                                                                                                                                                                                                                                                                                                                                                                            |        |                                                                                                                                                                                                  |                                                                                                                                                                                                                                                                                                                                                                                                                                                                         |  |  |  |  |                                                                                                                                                                                                                                                                                                                                                                                                                                                                                                         |  |  |  |  |                                                                                                                                                                                                                                                                                                                                                                                                                                           |                                                                                                                                                                                                                                                                                                                                                                                                                                                                                                                                                                                                                                                                                                                                                                                                                                                                                                                                                         |                                                                                                                                                                                                                                                                                                                                                                                                                                                                                                                                                                                                                                                                                                                                                                                                                                                                                                                                                                                                                                                                                                                                                                                                                                                                                                                                                                                                                                                                                                                                                                                                   |  |  |  |  |  |                                                                                                                                                                                                                                                                                                                                                                                                                                                                                                                                                                                                                                                                                                              |  |  |  |  |  |  |  |  |  |  |  |  |  |  |  |  |  |  |  |  |  |
|                                                                                                                                                                                                                                                                                                                                                                                                                                                                                                                                                                                                                                                                                                                                                                                                                                                                                                                                                                                                                                                                                                                                                                                                                                                                                                                                                                                                                                                                                                                                                                                                                                                                                                                                                                                                                                                                                                                                                                                                                                                                                                                                                                                                                                                                                                                                                                                                                                                                                                                                                                                                      |        |                                                                                                                                                                                                  |                                                                                                                                                                                                                                                                                                                                                                                                                                                                         |  |  |  |  |                                                                                                                                                                                                                                                                                                                                                                                                                                                                                                         |  |  |  |  |                                                                                                                                                                                                                                                                                                                                                                                                                                           |                                                                                                                                                                                                                                                                                                                                                                                                                                                                                                                                                                                                                                                                                                                                                                                                                                                                                                                                                         |                                                                                                                                                                                                                                                                                                                                                                                                                                                                                                                                                                                                                                                                                                                                                                                                                                                                                                                                                                                                                                                                                                                                                                                                                                                                                                                                                                                                                                                                                                                                                                                                   |  |  |  |  |  |                                                                                                                                                                                                                                                                                                                                                                                                                                                                                                                                                                                                                                                                                                              |  |  |  |  |  |  |  |  |  |  |  |  |  |  |  |  |  |  |  |  |  |
|                                                                                                                                                                                                                                                                                                                                                                                                                                                                                                                                                                                                                                                                                                                                                                                                                                                                                                                                                                                                                                                                                                                                                                                                                                                                                                                                                                                                                                                                                                                                                                                                                                                                                                                                                                                                                                                                                                                                                                                                                                                                                                                                                                                                                                                                                                                                                                                                                                                                                                                                                                                                      |        |                                                                                                                                                                                                  |                                                                                                                                                                                                                                                                                                                                                                                                                                                                         |  |  |  |  |                                                                                                                                                                                                                                                                                                                                                                                                                                                                                                         |  |  |  |  |                                                                                                                                                                                                                                                                                                                                                                                                                                           |                                                                                                                                                                                                                                                                                                                                                                                                                                                                                                                                                                                                                                                                                                                                                                                                                                                                                                                                                         |                                                                                                                                                                                                                                                                                                                                                                                                                                                                                                                                                                                                                                                                                                                                                                                                                                                                                                                                                                                                                                                                                                                                                                                                                                                                                                                                                                                                                                                                                                                                                                                                   |  |  |  |  |  |                                                                                                                                                                                                                                                                                                                                                                                                                                                                                                                                                                                                                                                                                                              |  |  |  |  |  |  |  |  |  |  |  |  |  |  |  |  |  |  |  |  |  |
| <b>7. Was the death an unexplained antepartum death?</b><br>Yes <input type="checkbox"/> No <input type="checkbox"/> Unknown <input type="checkbox"/><br><br><b>8. When did the death occur?</b><br>Before the onset of labour <input type="checkbox"/><br>During labour <input type="checkbox"/><br>Before birth, unknown time <input type="checkbox"/><br>After birth <input type="checkbox"/><br><br><b>9. Was there fetal growth restriction (weight less than 10th percentile)?</b><br>Yes <input type="checkbox"/> No <input type="checkbox"/> Unknown <input type="checkbox"/><br>Note: for stillbirths who died before the onset of labour, serial U/S evidence of FGR is required.                                                                                                                                                                                                                                                                                                                                                                                                                                                                                                                                                                                                                                                                                                                                                                                                                                                                                                                                                                                                                                                                                                                                                                                                                                                                                                                                                                                                                                                                                                                                                                                                                                                                                                                                                                                                                                                                                                          |        |                                                                                                                                                                                                  |                                                                                                                                                                                                                                                                                                                                                                                                                                                                         |  |  |  |  |                                                                                                                                                                                                                                                                                                                                                                                                                                                                                                         |  |  |  |  |                                                                                                                                                                                                                                                                                                                                                                                                                                           |                                                                                                                                                                                                                                                                                                                                                                                                                                                                                                                                                                                                                                                                                                                                                                                                                                                                                                                                                         |                                                                                                                                                                                                                                                                                                                                                                                                                                                                                                                                                                                                                                                                                                                                                                                                                                                                                                                                                                                                                                                                                                                                                                                                                                                                                                                                                                                                                                                                                                                                                                                                   |  |  |  |  |  |                                                                                                                                                                                                                                                                                                                                                                                                                                                                                                                                                                                                                                                                                                              |  |  |  |  |  |  |  |  |  |  |  |  |  |  |  |  |  |  |  |  |  |

4  
5  
6  
7  
8  
9  
10

| PART A (continued)                                                                                                                                                                                                                                                                                                                                                                                                                                                                                                                                                                                                                                                                                                                                                                                                                                                                                                                                                                                                                                                                                                                                                                                                                                                                                                                                                                                                                                                                                                                                                                                                                                                                                                                                                                                                                                                                                                                                                                                                                                                                                                                                                                                                                                                                                                                                                                                                                                              | PART B (Neonatal deaths only)                                                                                                                                                                                                                                                                                                                                                                                                                                                                                                                                                                                                                                                                                                                                                                                                                                                                                                                                                                                                                                                                                                                                                                                                                                                                                                                                                                                                                                                                                                                                                                                                                                                                                                                                                                                                                                                                                                                                                                                                                                                                                                                                                                                                                                                                      | MAIN CAUSE OF DEATH AND RELEVANT FACTORS                                                                                                                                                                                                                                                                                                                                                                                                                                                                                                                                                                                                                                                                                                                                                                                                                                                                                                                                                                                                                                                                                                                                                                                                                                                                                                                                                                                                                                                                                                                                                                                                                                                                                                                                                                                                                                                                                                                                                           |                   |                                |  |      |        |    |     |     |    |     |     |    |     |     |    |     |     |    |     |     |    |     |     |    |     |     |    |     |     |    |      |      |    |      |      |    |      |      |    |      |      |    |      |      |    |      |      |    |      |      |    |      |      |    |      |      |    |      |      |    |      |      |    |      |      |    |      |      |    |      |      |    |      |      |
|-----------------------------------------------------------------------------------------------------------------------------------------------------------------------------------------------------------------------------------------------------------------------------------------------------------------------------------------------------------------------------------------------------------------------------------------------------------------------------------------------------------------------------------------------------------------------------------------------------------------------------------------------------------------------------------------------------------------------------------------------------------------------------------------------------------------------------------------------------------------------------------------------------------------------------------------------------------------------------------------------------------------------------------------------------------------------------------------------------------------------------------------------------------------------------------------------------------------------------------------------------------------------------------------------------------------------------------------------------------------------------------------------------------------------------------------------------------------------------------------------------------------------------------------------------------------------------------------------------------------------------------------------------------------------------------------------------------------------------------------------------------------------------------------------------------------------------------------------------------------------------------------------------------------------------------------------------------------------------------------------------------------------------------------------------------------------------------------------------------------------------------------------------------------------------------------------------------------------------------------------------------------------------------------------------------------------------------------------------------------------------------------------------------------------------------------------------------------|----------------------------------------------------------------------------------------------------------------------------------------------------------------------------------------------------------------------------------------------------------------------------------------------------------------------------------------------------------------------------------------------------------------------------------------------------------------------------------------------------------------------------------------------------------------------------------------------------------------------------------------------------------------------------------------------------------------------------------------------------------------------------------------------------------------------------------------------------------------------------------------------------------------------------------------------------------------------------------------------------------------------------------------------------------------------------------------------------------------------------------------------------------------------------------------------------------------------------------------------------------------------------------------------------------------------------------------------------------------------------------------------------------------------------------------------------------------------------------------------------------------------------------------------------------------------------------------------------------------------------------------------------------------------------------------------------------------------------------------------------------------------------------------------------------------------------------------------------------------------------------------------------------------------------------------------------------------------------------------------------------------------------------------------------------------------------------------------------------------------------------------------------------------------------------------------------------------------------------------------------------------------------------------------------|----------------------------------------------------------------------------------------------------------------------------------------------------------------------------------------------------------------------------------------------------------------------------------------------------------------------------------------------------------------------------------------------------------------------------------------------------------------------------------------------------------------------------------------------------------------------------------------------------------------------------------------------------------------------------------------------------------------------------------------------------------------------------------------------------------------------------------------------------------------------------------------------------------------------------------------------------------------------------------------------------------------------------------------------------------------------------------------------------------------------------------------------------------------------------------------------------------------------------------------------------------------------------------------------------------------------------------------------------------------------------------------------------------------------------------------------------------------------------------------------------------------------------------------------------------------------------------------------------------------------------------------------------------------------------------------------------------------------------------------------------------------------------------------------------------------------------------------------------------------------------------------------------------------------------------------------------------------------------------------------------|-------------------|--------------------------------|--|------|--------|----|-----|-----|----|-----|-----|----|-----|-----|----|-----|-----|----|-----|-----|----|-----|-----|----|-----|-----|----|-----|-----|----|------|------|----|------|------|----|------|------|----|------|------|----|------|------|----|------|------|----|------|------|----|------|------|----|------|------|----|------|------|----|------|------|----|------|------|----|------|------|----|------|------|----|------|------|
| <p><b>17. Were there cord complications?</b><br/>           Yes <input type="checkbox"/> No <input type="checkbox"/> Unknown <input type="checkbox"/><br/>           If yes, describe: _____</p> <p><b>18. Was a major fetal abnormality present?</b><br/>           Yes <input type="checkbox"/> No <input type="checkbox"/> Unknown <input type="checkbox"/><br/>           If yes, describe: _____</p> <p><b>19. Was chorioamnionitis present?</b><br/>           Yes <input type="checkbox"/> No <input type="checkbox"/> Unknown <input type="checkbox"/><br/>           If yes, diagnosis was:<br/>               Pathological <input type="checkbox"/><br/>               Clinical <input type="checkbox"/><br/>           If yes, specify organism: _____</p> <p><b>20. Infant/ fetal infection?</b><br/>           Yes <input type="checkbox"/> No <input type="checkbox"/> Unknown <input type="checkbox"/><br/>           If yes: Streptococcus Group B <input type="checkbox"/><br/>               E Coli <input type="checkbox"/><br/>               Listeria monocytogenes <input type="checkbox"/><br/>               Cytomegalovirus <input type="checkbox"/><br/>               Parvovirus <input type="checkbox"/><br/>               Herpes simplex virus <input type="checkbox"/><br/>               Rubella virus <input type="checkbox"/><br/>               Toxoplasma <input type="checkbox"/><br/>               Syphilis <input type="checkbox"/><br/>               Other <input type="checkbox"/><br/>           If other, specify: _____</p> <p><b>21. Other conditions?</b><br/>           Yes <input type="checkbox"/> No <input type="checkbox"/> Unknown <input type="checkbox"/><br/>           If yes: Twin-to-twin transfusion <input type="checkbox"/><br/>               Fetomaternal haemorrhage <input type="checkbox"/><br/>               Uterine abnormality <input type="checkbox"/><br/>               Birth trauma <input type="checkbox"/><br/>               Haemolytic disease <input type="checkbox"/><br/>               Idiopathic hydrops <input type="checkbox"/><br/>               Drug dependence/abuse <input type="checkbox"/><br/>               Termination of pregnancy <input type="checkbox"/><br/>               Other <input type="checkbox"/><br/>           If other, specify: _____</p> <p><b>22. Classification of obstetric cause of death (see Attachment)</b><br/>           _____</p> | <p><b>THE MAIN CAUSE OF DEATH (tick one):</b></p> <p><b>1. Congenital abnormality</b> <input type="checkbox"/></p> <p><b>2. Extreme prematurity</b> <input type="checkbox"/><br/>           If yes, was resuscitation carried out?<br/>           Yes <input type="checkbox"/> No <input type="checkbox"/> Unknown <input type="checkbox"/></p> <p><b>3. Cardio-respiratory</b></p> <p>Hyaline membrane disease <input type="checkbox"/><br/>           Meconium aspiration syndrome <input type="checkbox"/><br/>           Primary persistent pulmonary hypertension <input type="checkbox"/><br/>           Pulmonary hypoplasia <input type="checkbox"/><br/>           Chronic neonatal lung disease <input type="checkbox"/><br/>           Other <input type="checkbox"/><br/>           If other, specify: _____</p> <p><b>4. Infection</b></p> <p>Congenital bacterial <input type="checkbox"/><br/>           Acquired bacterial <input type="checkbox"/><br/>           Congenital viral <input type="checkbox"/><br/>           Acquired viral <input type="checkbox"/><br/>           Protozoal eg Toxoplasma <input type="checkbox"/><br/>           Spirochaetal eg Syphilis <input type="checkbox"/><br/>           Fungal <input type="checkbox"/><br/>           Other <input type="checkbox"/><br/>           If other, specify: _____</p> <p><b>5. Neurological</b></p> <p>Hypoxic ischaemic encephalopathy/ perinatal asphyxia <input type="checkbox"/><br/>           Intracranial haemorrhage <input type="checkbox"/><br/>           Other <input type="checkbox"/><br/>           If other, specify: _____</p> <p><b>6. Gastrointestinal</b></p> <p>Necrotising enterocolitis <input type="checkbox"/><br/>           Other <input type="checkbox"/><br/>           If other, specify: _____</p> <p><b>7. Other</b></p> <p>SIDS: <input type="checkbox"/></p> <p>    Consistent with SIDS <input type="checkbox"/><br/>         Possible SIDS <input type="checkbox"/></p> <p>Multisystem failure (only if unknown primary cause or trigger event) <input type="checkbox"/><br/>           Trauma <input type="checkbox"/><br/>           Undetermined <input type="checkbox"/><br/>           Other <input type="checkbox"/><br/>           If other, specify: _____</p> | <p><b>Main cause of death as determined by hospital perinatal death review committee</b></p> <p>_____</p> <p>_____</p> <p><b>Relevant factors:</b></p> <p><i>Antenatal:</i> _____</p> <p>_____</p> <p><i>Intrapartum:</i> _____</p> <p>_____</p> <p><i>Postpartum:</i> _____</p> <p>_____</p> <p><b>Form completed by:</b><br/>           Name: _____</p> <p>Date:       /       /</p> <p><b>DEFINITION: FETAL GROWTH RESTRICTION</b></p> <p>Less than the 10th percentile for gestation.</p> <table border="1" data-bbox="959 1115 1287 1570"> <thead> <tr> <th rowspan="2">Gestation (weeks)</th> <th colspan="2">Weight (grams) 10th percentile</th> </tr> <tr> <th>Male</th> <th>Female</th> </tr> </thead> <tbody> <tr><td>22</td><td>400</td><td>400</td></tr> <tr><td>23</td><td>500</td><td>470</td></tr> <tr><td>24</td><td>520</td><td>540</td></tr> <tr><td>25</td><td>620</td><td>620</td></tr> <tr><td>26</td><td>720</td><td>680</td></tr> <tr><td>27</td><td>740</td><td>730</td></tr> <tr><td>28</td><td>850</td><td>760</td></tr> <tr><td>29</td><td>950</td><td>890</td></tr> <tr><td>30</td><td>1080</td><td>1045</td></tr> <tr><td>31</td><td>1310</td><td>1140</td></tr> <tr><td>32</td><td>1400</td><td>1340</td></tr> <tr><td>33</td><td>1640</td><td>1520</td></tr> <tr><td>34</td><td>1840</td><td>1760</td></tr> <tr><td>35</td><td>2110</td><td>2030</td></tr> <tr><td>36</td><td>2320</td><td>2220</td></tr> <tr><td>37</td><td>2550</td><td>2430</td></tr> <tr><td>38</td><td>2780</td><td>2660</td></tr> <tr><td>39</td><td>2940</td><td>2820</td></tr> <tr><td>40</td><td>3070</td><td>2950</td></tr> <tr><td>41</td><td>3180</td><td>3050</td></tr> <tr><td>42</td><td>3210</td><td>3080</td></tr> <tr><td>43</td><td>3080</td><td>2950</td></tr> <tr><td>44</td><td>3050</td><td>2930</td></tr> </tbody> </table> <p>Source: Roberts CL, Lancaster PAL. Australian national birthweight percentiles by gestational age. <i>Med J Aust</i> 1999; 170: 114-118.</p> | Gestation (weeks) | Weight (grams) 10th percentile |  | Male | Female | 22 | 400 | 400 | 23 | 500 | 470 | 24 | 520 | 540 | 25 | 620 | 620 | 26 | 720 | 680 | 27 | 740 | 730 | 28 | 850 | 760 | 29 | 950 | 890 | 30 | 1080 | 1045 | 31 | 1310 | 1140 | 32 | 1400 | 1340 | 33 | 1640 | 1520 | 34 | 1840 | 1760 | 35 | 2110 | 2030 | 36 | 2320 | 2220 | 37 | 2550 | 2430 | 38 | 2780 | 2660 | 39 | 2940 | 2820 | 40 | 3070 | 2950 | 41 | 3180 | 3050 | 42 | 3210 | 3080 | 43 | 3080 | 2950 | 44 | 3050 | 2930 |
| Gestation (weeks)                                                                                                                                                                                                                                                                                                                                                                                                                                                                                                                                                                                                                                                                                                                                                                                                                                                                                                                                                                                                                                                                                                                                                                                                                                                                                                                                                                                                                                                                                                                                                                                                                                                                                                                                                                                                                                                                                                                                                                                                                                                                                                                                                                                                                                                                                                                                                                                                                                               | Weight (grams) 10th percentile                                                                                                                                                                                                                                                                                                                                                                                                                                                                                                                                                                                                                                                                                                                                                                                                                                                                                                                                                                                                                                                                                                                                                                                                                                                                                                                                                                                                                                                                                                                                                                                                                                                                                                                                                                                                                                                                                                                                                                                                                                                                                                                                                                                                                                                                     |                                                                                                                                                                                                                                                                                                                                                                                                                                                                                                                                                                                                                                                                                                                                                                                                                                                                                                                                                                                                                                                                                                                                                                                                                                                                                                                                                                                                                                                                                                                                                                                                                                                                                                                                                                                                                                                                                                                                                                                                    |                   |                                |  |      |        |    |     |     |    |     |     |    |     |     |    |     |     |    |     |     |    |     |     |    |     |     |    |     |     |    |      |      |    |      |      |    |      |      |    |      |      |    |      |      |    |      |      |    |      |      |    |      |      |    |      |      |    |      |      |    |      |      |    |      |      |    |      |      |    |      |      |    |      |      |
|                                                                                                                                                                                                                                                                                                                                                                                                                                                                                                                                                                                                                                                                                                                                                                                                                                                                                                                                                                                                                                                                                                                                                                                                                                                                                                                                                                                                                                                                                                                                                                                                                                                                                                                                                                                                                                                                                                                                                                                                                                                                                                                                                                                                                                                                                                                                                                                                                                                                 | Male                                                                                                                                                                                                                                                                                                                                                                                                                                                                                                                                                                                                                                                                                                                                                                                                                                                                                                                                                                                                                                                                                                                                                                                                                                                                                                                                                                                                                                                                                                                                                                                                                                                                                                                                                                                                                                                                                                                                                                                                                                                                                                                                                                                                                                                                                               | Female                                                                                                                                                                                                                                                                                                                                                                                                                                                                                                                                                                                                                                                                                                                                                                                                                                                                                                                                                                                                                                                                                                                                                                                                                                                                                                                                                                                                                                                                                                                                                                                                                                                                                                                                                                                                                                                                                                                                                                                             |                   |                                |  |      |        |    |     |     |    |     |     |    |     |     |    |     |     |    |     |     |    |     |     |    |     |     |    |     |     |    |      |      |    |      |      |    |      |      |    |      |      |    |      |      |    |      |      |    |      |      |    |      |      |    |      |      |    |      |      |    |      |      |    |      |      |    |      |      |    |      |      |    |      |      |
| 22                                                                                                                                                                                                                                                                                                                                                                                                                                                                                                                                                                                                                                                                                                                                                                                                                                                                                                                                                                                                                                                                                                                                                                                                                                                                                                                                                                                                                                                                                                                                                                                                                                                                                                                                                                                                                                                                                                                                                                                                                                                                                                                                                                                                                                                                                                                                                                                                                                                              | 400                                                                                                                                                                                                                                                                                                                                                                                                                                                                                                                                                                                                                                                                                                                                                                                                                                                                                                                                                                                                                                                                                                                                                                                                                                                                                                                                                                                                                                                                                                                                                                                                                                                                                                                                                                                                                                                                                                                                                                                                                                                                                                                                                                                                                                                                                                | 400                                                                                                                                                                                                                                                                                                                                                                                                                                                                                                                                                                                                                                                                                                                                                                                                                                                                                                                                                                                                                                                                                                                                                                                                                                                                                                                                                                                                                                                                                                                                                                                                                                                                                                                                                                                                                                                                                                                                                                                                |                   |                                |  |      |        |    |     |     |    |     |     |    |     |     |    |     |     |    |     |     |    |     |     |    |     |     |    |     |     |    |      |      |    |      |      |    |      |      |    |      |      |    |      |      |    |      |      |    |      |      |    |      |      |    |      |      |    |      |      |    |      |      |    |      |      |    |      |      |    |      |      |    |      |      |
| 23                                                                                                                                                                                                                                                                                                                                                                                                                                                                                                                                                                                                                                                                                                                                                                                                                                                                                                                                                                                                                                                                                                                                                                                                                                                                                                                                                                                                                                                                                                                                                                                                                                                                                                                                                                                                                                                                                                                                                                                                                                                                                                                                                                                                                                                                                                                                                                                                                                                              | 500                                                                                                                                                                                                                                                                                                                                                                                                                                                                                                                                                                                                                                                                                                                                                                                                                                                                                                                                                                                                                                                                                                                                                                                                                                                                                                                                                                                                                                                                                                                                                                                                                                                                                                                                                                                                                                                                                                                                                                                                                                                                                                                                                                                                                                                                                                | 470                                                                                                                                                                                                                                                                                                                                                                                                                                                                                                                                                                                                                                                                                                                                                                                                                                                                                                                                                                                                                                                                                                                                                                                                                                                                                                                                                                                                                                                                                                                                                                                                                                                                                                                                                                                                                                                                                                                                                                                                |                   |                                |  |      |        |    |     |     |    |     |     |    |     |     |    |     |     |    |     |     |    |     |     |    |     |     |    |     |     |    |      |      |    |      |      |    |      |      |    |      |      |    |      |      |    |      |      |    |      |      |    |      |      |    |      |      |    |      |      |    |      |      |    |      |      |    |      |      |    |      |      |    |      |      |
| 24                                                                                                                                                                                                                                                                                                                                                                                                                                                                                                                                                                                                                                                                                                                                                                                                                                                                                                                                                                                                                                                                                                                                                                                                                                                                                                                                                                                                                                                                                                                                                                                                                                                                                                                                                                                                                                                                                                                                                                                                                                                                                                                                                                                                                                                                                                                                                                                                                                                              | 520                                                                                                                                                                                                                                                                                                                                                                                                                                                                                                                                                                                                                                                                                                                                                                                                                                                                                                                                                                                                                                                                                                                                                                                                                                                                                                                                                                                                                                                                                                                                                                                                                                                                                                                                                                                                                                                                                                                                                                                                                                                                                                                                                                                                                                                                                                | 540                                                                                                                                                                                                                                                                                                                                                                                                                                                                                                                                                                                                                                                                                                                                                                                                                                                                                                                                                                                                                                                                                                                                                                                                                                                                                                                                                                                                                                                                                                                                                                                                                                                                                                                                                                                                                                                                                                                                                                                                |                   |                                |  |      |        |    |     |     |    |     |     |    |     |     |    |     |     |    |     |     |    |     |     |    |     |     |    |     |     |    |      |      |    |      |      |    |      |      |    |      |      |    |      |      |    |      |      |    |      |      |    |      |      |    |      |      |    |      |      |    |      |      |    |      |      |    |      |      |    |      |      |    |      |      |
| 25                                                                                                                                                                                                                                                                                                                                                                                                                                                                                                                                                                                                                                                                                                                                                                                                                                                                                                                                                                                                                                                                                                                                                                                                                                                                                                                                                                                                                                                                                                                                                                                                                                                                                                                                                                                                                                                                                                                                                                                                                                                                                                                                                                                                                                                                                                                                                                                                                                                              | 620                                                                                                                                                                                                                                                                                                                                                                                                                                                                                                                                                                                                                                                                                                                                                                                                                                                                                                                                                                                                                                                                                                                                                                                                                                                                                                                                                                                                                                                                                                                                                                                                                                                                                                                                                                                                                                                                                                                                                                                                                                                                                                                                                                                                                                                                                                | 620                                                                                                                                                                                                                                                                                                                                                                                                                                                                                                                                                                                                                                                                                                                                                                                                                                                                                                                                                                                                                                                                                                                                                                                                                                                                                                                                                                                                                                                                                                                                                                                                                                                                                                                                                                                                                                                                                                                                                                                                |                   |                                |  |      |        |    |     |     |    |     |     |    |     |     |    |     |     |    |     |     |    |     |     |    |     |     |    |     |     |    |      |      |    |      |      |    |      |      |    |      |      |    |      |      |    |      |      |    |      |      |    |      |      |    |      |      |    |      |      |    |      |      |    |      |      |    |      |      |    |      |      |    |      |      |
| 26                                                                                                                                                                                                                                                                                                                                                                                                                                                                                                                                                                                                                                                                                                                                                                                                                                                                                                                                                                                                                                                                                                                                                                                                                                                                                                                                                                                                                                                                                                                                                                                                                                                                                                                                                                                                                                                                                                                                                                                                                                                                                                                                                                                                                                                                                                                                                                                                                                                              | 720                                                                                                                                                                                                                                                                                                                                                                                                                                                                                                                                                                                                                                                                                                                                                                                                                                                                                                                                                                                                                                                                                                                                                                                                                                                                                                                                                                                                                                                                                                                                                                                                                                                                                                                                                                                                                                                                                                                                                                                                                                                                                                                                                                                                                                                                                                | 680                                                                                                                                                                                                                                                                                                                                                                                                                                                                                                                                                                                                                                                                                                                                                                                                                                                                                                                                                                                                                                                                                                                                                                                                                                                                                                                                                                                                                                                                                                                                                                                                                                                                                                                                                                                                                                                                                                                                                                                                |                   |                                |  |      |        |    |     |     |    |     |     |    |     |     |    |     |     |    |     |     |    |     |     |    |     |     |    |     |     |    |      |      |    |      |      |    |      |      |    |      |      |    |      |      |    |      |      |    |      |      |    |      |      |    |      |      |    |      |      |    |      |      |    |      |      |    |      |      |    |      |      |    |      |      |
| 27                                                                                                                                                                                                                                                                                                                                                                                                                                                                                                                                                                                                                                                                                                                                                                                                                                                                                                                                                                                                                                                                                                                                                                                                                                                                                                                                                                                                                                                                                                                                                                                                                                                                                                                                                                                                                                                                                                                                                                                                                                                                                                                                                                                                                                                                                                                                                                                                                                                              | 740                                                                                                                                                                                                                                                                                                                                                                                                                                                                                                                                                                                                                                                                                                                                                                                                                                                                                                                                                                                                                                                                                                                                                                                                                                                                                                                                                                                                                                                                                                                                                                                                                                                                                                                                                                                                                                                                                                                                                                                                                                                                                                                                                                                                                                                                                                | 730                                                                                                                                                                                                                                                                                                                                                                                                                                                                                                                                                                                                                                                                                                                                                                                                                                                                                                                                                                                                                                                                                                                                                                                                                                                                                                                                                                                                                                                                                                                                                                                                                                                                                                                                                                                                                                                                                                                                                                                                |                   |                                |  |      |        |    |     |     |    |     |     |    |     |     |    |     |     |    |     |     |    |     |     |    |     |     |    |     |     |    |      |      |    |      |      |    |      |      |    |      |      |    |      |      |    |      |      |    |      |      |    |      |      |    |      |      |    |      |      |    |      |      |    |      |      |    |      |      |    |      |      |    |      |      |
| 28                                                                                                                                                                                                                                                                                                                                                                                                                                                                                                                                                                                                                                                                                                                                                                                                                                                                                                                                                                                                                                                                                                                                                                                                                                                                                                                                                                                                                                                                                                                                                                                                                                                                                                                                                                                                                                                                                                                                                                                                                                                                                                                                                                                                                                                                                                                                                                                                                                                              | 850                                                                                                                                                                                                                                                                                                                                                                                                                                                                                                                                                                                                                                                                                                                                                                                                                                                                                                                                                                                                                                                                                                                                                                                                                                                                                                                                                                                                                                                                                                                                                                                                                                                                                                                                                                                                                                                                                                                                                                                                                                                                                                                                                                                                                                                                                                | 760                                                                                                                                                                                                                                                                                                                                                                                                                                                                                                                                                                                                                                                                                                                                                                                                                                                                                                                                                                                                                                                                                                                                                                                                                                                                                                                                                                                                                                                                                                                                                                                                                                                                                                                                                                                                                                                                                                                                                                                                |                   |                                |  |      |        |    |     |     |    |     |     |    |     |     |    |     |     |    |     |     |    |     |     |    |     |     |    |     |     |    |      |      |    |      |      |    |      |      |    |      |      |    |      |      |    |      |      |    |      |      |    |      |      |    |      |      |    |      |      |    |      |      |    |      |      |    |      |      |    |      |      |    |      |      |
| 29                                                                                                                                                                                                                                                                                                                                                                                                                                                                                                                                                                                                                                                                                                                                                                                                                                                                                                                                                                                                                                                                                                                                                                                                                                                                                                                                                                                                                                                                                                                                                                                                                                                                                                                                                                                                                                                                                                                                                                                                                                                                                                                                                                                                                                                                                                                                                                                                                                                              | 950                                                                                                                                                                                                                                                                                                                                                                                                                                                                                                                                                                                                                                                                                                                                                                                                                                                                                                                                                                                                                                                                                                                                                                                                                                                                                                                                                                                                                                                                                                                                                                                                                                                                                                                                                                                                                                                                                                                                                                                                                                                                                                                                                                                                                                                                                                | 890                                                                                                                                                                                                                                                                                                                                                                                                                                                                                                                                                                                                                                                                                                                                                                                                                                                                                                                                                                                                                                                                                                                                                                                                                                                                                                                                                                                                                                                                                                                                                                                                                                                                                                                                                                                                                                                                                                                                                                                                |                   |                                |  |      |        |    |     |     |    |     |     |    |     |     |    |     |     |    |     |     |    |     |     |    |     |     |    |     |     |    |      |      |    |      |      |    |      |      |    |      |      |    |      |      |    |      |      |    |      |      |    |      |      |    |      |      |    |      |      |    |      |      |    |      |      |    |      |      |    |      |      |    |      |      |
| 30                                                                                                                                                                                                                                                                                                                                                                                                                                                                                                                                                                                                                                                                                                                                                                                                                                                                                                                                                                                                                                                                                                                                                                                                                                                                                                                                                                                                                                                                                                                                                                                                                                                                                                                                                                                                                                                                                                                                                                                                                                                                                                                                                                                                                                                                                                                                                                                                                                                              | 1080                                                                                                                                                                                                                                                                                                                                                                                                                                                                                                                                                                                                                                                                                                                                                                                                                                                                                                                                                                                                                                                                                                                                                                                                                                                                                                                                                                                                                                                                                                                                                                                                                                                                                                                                                                                                                                                                                                                                                                                                                                                                                                                                                                                                                                                                                               | 1045                                                                                                                                                                                                                                                                                                                                                                                                                                                                                                                                                                                                                                                                                                                                                                                                                                                                                                                                                                                                                                                                                                                                                                                                                                                                                                                                                                                                                                                                                                                                                                                                                                                                                                                                                                                                                                                                                                                                                                                               |                   |                                |  |      |        |    |     |     |    |     |     |    |     |     |    |     |     |    |     |     |    |     |     |    |     |     |    |     |     |    |      |      |    |      |      |    |      |      |    |      |      |    |      |      |    |      |      |    |      |      |    |      |      |    |      |      |    |      |      |    |      |      |    |      |      |    |      |      |    |      |      |    |      |      |
| 31                                                                                                                                                                                                                                                                                                                                                                                                                                                                                                                                                                                                                                                                                                                                                                                                                                                                                                                                                                                                                                                                                                                                                                                                                                                                                                                                                                                                                                                                                                                                                                                                                                                                                                                                                                                                                                                                                                                                                                                                                                                                                                                                                                                                                                                                                                                                                                                                                                                              | 1310                                                                                                                                                                                                                                                                                                                                                                                                                                                                                                                                                                                                                                                                                                                                                                                                                                                                                                                                                                                                                                                                                                                                                                                                                                                                                                                                                                                                                                                                                                                                                                                                                                                                                                                                                                                                                                                                                                                                                                                                                                                                                                                                                                                                                                                                                               | 1140                                                                                                                                                                                                                                                                                                                                                                                                                                                                                                                                                                                                                                                                                                                                                                                                                                                                                                                                                                                                                                                                                                                                                                                                                                                                                                                                                                                                                                                                                                                                                                                                                                                                                                                                                                                                                                                                                                                                                                                               |                   |                                |  |      |        |    |     |     |    |     |     |    |     |     |    |     |     |    |     |     |    |     |     |    |     |     |    |     |     |    |      |      |    |      |      |    |      |      |    |      |      |    |      |      |    |      |      |    |      |      |    |      |      |    |      |      |    |      |      |    |      |      |    |      |      |    |      |      |    |      |      |    |      |      |
| 32                                                                                                                                                                                                                                                                                                                                                                                                                                                                                                                                                                                                                                                                                                                                                                                                                                                                                                                                                                                                                                                                                                                                                                                                                                                                                                                                                                                                                                                                                                                                                                                                                                                                                                                                                                                                                                                                                                                                                                                                                                                                                                                                                                                                                                                                                                                                                                                                                                                              | 1400                                                                                                                                                                                                                                                                                                                                                                                                                                                                                                                                                                                                                                                                                                                                                                                                                                                                                                                                                                                                                                                                                                                                                                                                                                                                                                                                                                                                                                                                                                                                                                                                                                                                                                                                                                                                                                                                                                                                                                                                                                                                                                                                                                                                                                                                                               | 1340                                                                                                                                                                                                                                                                                                                                                                                                                                                                                                                                                                                                                                                                                                                                                                                                                                                                                                                                                                                                                                                                                                                                                                                                                                                                                                                                                                                                                                                                                                                                                                                                                                                                                                                                                                                                                                                                                                                                                                                               |                   |                                |  |      |        |    |     |     |    |     |     |    |     |     |    |     |     |    |     |     |    |     |     |    |     |     |    |     |     |    |      |      |    |      |      |    |      |      |    |      |      |    |      |      |    |      |      |    |      |      |    |      |      |    |      |      |    |      |      |    |      |      |    |      |      |    |      |      |    |      |      |    |      |      |
| 33                                                                                                                                                                                                                                                                                                                                                                                                                                                                                                                                                                                                                                                                                                                                                                                                                                                                                                                                                                                                                                                                                                                                                                                                                                                                                                                                                                                                                                                                                                                                                                                                                                                                                                                                                                                                                                                                                                                                                                                                                                                                                                                                                                                                                                                                                                                                                                                                                                                              | 1640                                                                                                                                                                                                                                                                                                                                                                                                                                                                                                                                                                                                                                                                                                                                                                                                                                                                                                                                                                                                                                                                                                                                                                                                                                                                                                                                                                                                                                                                                                                                                                                                                                                                                                                                                                                                                                                                                                                                                                                                                                                                                                                                                                                                                                                                                               | 1520                                                                                                                                                                                                                                                                                                                                                                                                                                                                                                                                                                                                                                                                                                                                                                                                                                                                                                                                                                                                                                                                                                                                                                                                                                                                                                                                                                                                                                                                                                                                                                                                                                                                                                                                                                                                                                                                                                                                                                                               |                   |                                |  |      |        |    |     |     |    |     |     |    |     |     |    |     |     |    |     |     |    |     |     |    |     |     |    |     |     |    |      |      |    |      |      |    |      |      |    |      |      |    |      |      |    |      |      |    |      |      |    |      |      |    |      |      |    |      |      |    |      |      |    |      |      |    |      |      |    |      |      |    |      |      |
| 34                                                                                                                                                                                                                                                                                                                                                                                                                                                                                                                                                                                                                                                                                                                                                                                                                                                                                                                                                                                                                                                                                                                                                                                                                                                                                                                                                                                                                                                                                                                                                                                                                                                                                                                                                                                                                                                                                                                                                                                                                                                                                                                                                                                                                                                                                                                                                                                                                                                              | 1840                                                                                                                                                                                                                                                                                                                                                                                                                                                                                                                                                                                                                                                                                                                                                                                                                                                                                                                                                                                                                                                                                                                                                                                                                                                                                                                                                                                                                                                                                                                                                                                                                                                                                                                                                                                                                                                                                                                                                                                                                                                                                                                                                                                                                                                                                               | 1760                                                                                                                                                                                                                                                                                                                                                                                                                                                                                                                                                                                                                                                                                                                                                                                                                                                                                                                                                                                                                                                                                                                                                                                                                                                                                                                                                                                                                                                                                                                                                                                                                                                                                                                                                                                                                                                                                                                                                                                               |                   |                                |  |      |        |    |     |     |    |     |     |    |     |     |    |     |     |    |     |     |    |     |     |    |     |     |    |     |     |    |      |      |    |      |      |    |      |      |    |      |      |    |      |      |    |      |      |    |      |      |    |      |      |    |      |      |    |      |      |    |      |      |    |      |      |    |      |      |    |      |      |    |      |      |
| 35                                                                                                                                                                                                                                                                                                                                                                                                                                                                                                                                                                                                                                                                                                                                                                                                                                                                                                                                                                                                                                                                                                                                                                                                                                                                                                                                                                                                                                                                                                                                                                                                                                                                                                                                                                                                                                                                                                                                                                                                                                                                                                                                                                                                                                                                                                                                                                                                                                                              | 2110                                                                                                                                                                                                                                                                                                                                                                                                                                                                                                                                                                                                                                                                                                                                                                                                                                                                                                                                                                                                                                                                                                                                                                                                                                                                                                                                                                                                                                                                                                                                                                                                                                                                                                                                                                                                                                                                                                                                                                                                                                                                                                                                                                                                                                                                                               | 2030                                                                                                                                                                                                                                                                                                                                                                                                                                                                                                                                                                                                                                                                                                                                                                                                                                                                                                                                                                                                                                                                                                                                                                                                                                                                                                                                                                                                                                                                                                                                                                                                                                                                                                                                                                                                                                                                                                                                                                                               |                   |                                |  |      |        |    |     |     |    |     |     |    |     |     |    |     |     |    |     |     |    |     |     |    |     |     |    |     |     |    |      |      |    |      |      |    |      |      |    |      |      |    |      |      |    |      |      |    |      |      |    |      |      |    |      |      |    |      |      |    |      |      |    |      |      |    |      |      |    |      |      |    |      |      |
| 36                                                                                                                                                                                                                                                                                                                                                                                                                                                                                                                                                                                                                                                                                                                                                                                                                                                                                                                                                                                                                                                                                                                                                                                                                                                                                                                                                                                                                                                                                                                                                                                                                                                                                                                                                                                                                                                                                                                                                                                                                                                                                                                                                                                                                                                                                                                                                                                                                                                              | 2320                                                                                                                                                                                                                                                                                                                                                                                                                                                                                                                                                                                                                                                                                                                                                                                                                                                                                                                                                                                                                                                                                                                                                                                                                                                                                                                                                                                                                                                                                                                                                                                                                                                                                                                                                                                                                                                                                                                                                                                                                                                                                                                                                                                                                                                                                               | 2220                                                                                                                                                                                                                                                                                                                                                                                                                                                                                                                                                                                                                                                                                                                                                                                                                                                                                                                                                                                                                                                                                                                                                                                                                                                                                                                                                                                                                                                                                                                                                                                                                                                                                                                                                                                                                                                                                                                                                                                               |                   |                                |  |      |        |    |     |     |    |     |     |    |     |     |    |     |     |    |     |     |    |     |     |    |     |     |    |     |     |    |      |      |    |      |      |    |      |      |    |      |      |    |      |      |    |      |      |    |      |      |    |      |      |    |      |      |    |      |      |    |      |      |    |      |      |    |      |      |    |      |      |    |      |      |
| 37                                                                                                                                                                                                                                                                                                                                                                                                                                                                                                                                                                                                                                                                                                                                                                                                                                                                                                                                                                                                                                                                                                                                                                                                                                                                                                                                                                                                                                                                                                                                                                                                                                                                                                                                                                                                                                                                                                                                                                                                                                                                                                                                                                                                                                                                                                                                                                                                                                                              | 2550                                                                                                                                                                                                                                                                                                                                                                                                                                                                                                                                                                                                                                                                                                                                                                                                                                                                                                                                                                                                                                                                                                                                                                                                                                                                                                                                                                                                                                                                                                                                                                                                                                                                                                                                                                                                                                                                                                                                                                                                                                                                                                                                                                                                                                                                                               | 2430                                                                                                                                                                                                                                                                                                                                                                                                                                                                                                                                                                                                                                                                                                                                                                                                                                                                                                                                                                                                                                                                                                                                                                                                                                                                                                                                                                                                                                                                                                                                                                                                                                                                                                                                                                                                                                                                                                                                                                                               |                   |                                |  |      |        |    |     |     |    |     |     |    |     |     |    |     |     |    |     |     |    |     |     |    |     |     |    |     |     |    |      |      |    |      |      |    |      |      |    |      |      |    |      |      |    |      |      |    |      |      |    |      |      |    |      |      |    |      |      |    |      |      |    |      |      |    |      |      |    |      |      |    |      |      |
| 38                                                                                                                                                                                                                                                                                                                                                                                                                                                                                                                                                                                                                                                                                                                                                                                                                                                                                                                                                                                                                                                                                                                                                                                                                                                                                                                                                                                                                                                                                                                                                                                                                                                                                                                                                                                                                                                                                                                                                                                                                                                                                                                                                                                                                                                                                                                                                                                                                                                              | 2780                                                                                                                                                                                                                                                                                                                                                                                                                                                                                                                                                                                                                                                                                                                                                                                                                                                                                                                                                                                                                                                                                                                                                                                                                                                                                                                                                                                                                                                                                                                                                                                                                                                                                                                                                                                                                                                                                                                                                                                                                                                                                                                                                                                                                                                                                               | 2660                                                                                                                                                                                                                                                                                                                                                                                                                                                                                                                                                                                                                                                                                                                                                                                                                                                                                                                                                                                                                                                                                                                                                                                                                                                                                                                                                                                                                                                                                                                                                                                                                                                                                                                                                                                                                                                                                                                                                                                               |                   |                                |  |      |        |    |     |     |    |     |     |    |     |     |    |     |     |    |     |     |    |     |     |    |     |     |    |     |     |    |      |      |    |      |      |    |      |      |    |      |      |    |      |      |    |      |      |    |      |      |    |      |      |    |      |      |    |      |      |    |      |      |    |      |      |    |      |      |    |      |      |    |      |      |
| 39                                                                                                                                                                                                                                                                                                                                                                                                                                                                                                                                                                                                                                                                                                                                                                                                                                                                                                                                                                                                                                                                                                                                                                                                                                                                                                                                                                                                                                                                                                                                                                                                                                                                                                                                                                                                                                                                                                                                                                                                                                                                                                                                                                                                                                                                                                                                                                                                                                                              | 2940                                                                                                                                                                                                                                                                                                                                                                                                                                                                                                                                                                                                                                                                                                                                                                                                                                                                                                                                                                                                                                                                                                                                                                                                                                                                                                                                                                                                                                                                                                                                                                                                                                                                                                                                                                                                                                                                                                                                                                                                                                                                                                                                                                                                                                                                                               | 2820                                                                                                                                                                                                                                                                                                                                                                                                                                                                                                                                                                                                                                                                                                                                                                                                                                                                                                                                                                                                                                                                                                                                                                                                                                                                                                                                                                                                                                                                                                                                                                                                                                                                                                                                                                                                                                                                                                                                                                                               |                   |                                |  |      |        |    |     |     |    |     |     |    |     |     |    |     |     |    |     |     |    |     |     |    |     |     |    |     |     |    |      |      |    |      |      |    |      |      |    |      |      |    |      |      |    |      |      |    |      |      |    |      |      |    |      |      |    |      |      |    |      |      |    |      |      |    |      |      |    |      |      |    |      |      |
| 40                                                                                                                                                                                                                                                                                                                                                                                                                                                                                                                                                                                                                                                                                                                                                                                                                                                                                                                                                                                                                                                                                                                                                                                                                                                                                                                                                                                                                                                                                                                                                                                                                                                                                                                                                                                                                                                                                                                                                                                                                                                                                                                                                                                                                                                                                                                                                                                                                                                              | 3070                                                                                                                                                                                                                                                                                                                                                                                                                                                                                                                                                                                                                                                                                                                                                                                                                                                                                                                                                                                                                                                                                                                                                                                                                                                                                                                                                                                                                                                                                                                                                                                                                                                                                                                                                                                                                                                                                                                                                                                                                                                                                                                                                                                                                                                                                               | 2950                                                                                                                                                                                                                                                                                                                                                                                                                                                                                                                                                                                                                                                                                                                                                                                                                                                                                                                                                                                                                                                                                                                                                                                                                                                                                                                                                                                                                                                                                                                                                                                                                                                                                                                                                                                                                                                                                                                                                                                               |                   |                                |  |      |        |    |     |     |    |     |     |    |     |     |    |     |     |    |     |     |    |     |     |    |     |     |    |     |     |    |      |      |    |      |      |    |      |      |    |      |      |    |      |      |    |      |      |    |      |      |    |      |      |    |      |      |    |      |      |    |      |      |    |      |      |    |      |      |    |      |      |    |      |      |
| 41                                                                                                                                                                                                                                                                                                                                                                                                                                                                                                                                                                                                                                                                                                                                                                                                                                                                                                                                                                                                                                                                                                                                                                                                                                                                                                                                                                                                                                                                                                                                                                                                                                                                                                                                                                                                                                                                                                                                                                                                                                                                                                                                                                                                                                                                                                                                                                                                                                                              | 3180                                                                                                                                                                                                                                                                                                                                                                                                                                                                                                                                                                                                                                                                                                                                                                                                                                                                                                                                                                                                                                                                                                                                                                                                                                                                                                                                                                                                                                                                                                                                                                                                                                                                                                                                                                                                                                                                                                                                                                                                                                                                                                                                                                                                                                                                                               | 3050                                                                                                                                                                                                                                                                                                                                                                                                                                                                                                                                                                                                                                                                                                                                                                                                                                                                                                                                                                                                                                                                                                                                                                                                                                                                                                                                                                                                                                                                                                                                                                                                                                                                                                                                                                                                                                                                                                                                                                                               |                   |                                |  |      |        |    |     |     |    |     |     |    |     |     |    |     |     |    |     |     |    |     |     |    |     |     |    |     |     |    |      |      |    |      |      |    |      |      |    |      |      |    |      |      |    |      |      |    |      |      |    |      |      |    |      |      |    |      |      |    |      |      |    |      |      |    |      |      |    |      |      |    |      |      |
| 42                                                                                                                                                                                                                                                                                                                                                                                                                                                                                                                                                                                                                                                                                                                                                                                                                                                                                                                                                                                                                                                                                                                                                                                                                                                                                                                                                                                                                                                                                                                                                                                                                                                                                                                                                                                                                                                                                                                                                                                                                                                                                                                                                                                                                                                                                                                                                                                                                                                              | 3210                                                                                                                                                                                                                                                                                                                                                                                                                                                                                                                                                                                                                                                                                                                                                                                                                                                                                                                                                                                                                                                                                                                                                                                                                                                                                                                                                                                                                                                                                                                                                                                                                                                                                                                                                                                                                                                                                                                                                                                                                                                                                                                                                                                                                                                                                               | 3080                                                                                                                                                                                                                                                                                                                                                                                                                                                                                                                                                                                                                                                                                                                                                                                                                                                                                                                                                                                                                                                                                                                                                                                                                                                                                                                                                                                                                                                                                                                                                                                                                                                                                                                                                                                                                                                                                                                                                                                               |                   |                                |  |      |        |    |     |     |    |     |     |    |     |     |    |     |     |    |     |     |    |     |     |    |     |     |    |     |     |    |      |      |    |      |      |    |      |      |    |      |      |    |      |      |    |      |      |    |      |      |    |      |      |    |      |      |    |      |      |    |      |      |    |      |      |    |      |      |    |      |      |    |      |      |
| 43                                                                                                                                                                                                                                                                                                                                                                                                                                                                                                                                                                                                                                                                                                                                                                                                                                                                                                                                                                                                                                                                                                                                                                                                                                                                                                                                                                                                                                                                                                                                                                                                                                                                                                                                                                                                                                                                                                                                                                                                                                                                                                                                                                                                                                                                                                                                                                                                                                                              | 3080                                                                                                                                                                                                                                                                                                                                                                                                                                                                                                                                                                                                                                                                                                                                                                                                                                                                                                                                                                                                                                                                                                                                                                                                                                                                                                                                                                                                                                                                                                                                                                                                                                                                                                                                                                                                                                                                                                                                                                                                                                                                                                                                                                                                                                                                                               | 2950                                                                                                                                                                                                                                                                                                                                                                                                                                                                                                                                                                                                                                                                                                                                                                                                                                                                                                                                                                                                                                                                                                                                                                                                                                                                                                                                                                                                                                                                                                                                                                                                                                                                                                                                                                                                                                                                                                                                                                                               |                   |                                |  |      |        |    |     |     |    |     |     |    |     |     |    |     |     |    |     |     |    |     |     |    |     |     |    |     |     |    |      |      |    |      |      |    |      |      |    |      |      |    |      |      |    |      |      |    |      |      |    |      |      |    |      |      |    |      |      |    |      |      |    |      |      |    |      |      |    |      |      |    |      |      |
| 44                                                                                                                                                                                                                                                                                                                                                                                                                                                                                                                                                                                                                                                                                                                                                                                                                                                                                                                                                                                                                                                                                                                                                                                                                                                                                                                                                                                                                                                                                                                                                                                                                                                                                                                                                                                                                                                                                                                                                                                                                                                                                                                                                                                                                                                                                                                                                                                                                                                              | 3050                                                                                                                                                                                                                                                                                                                                                                                                                                                                                                                                                                                                                                                                                                                                                                                                                                                                                                                                                                                                                                                                                                                                                                                                                                                                                                                                                                                                                                                                                                                                                                                                                                                                                                                                                                                                                                                                                                                                                                                                                                                                                                                                                                                                                                                                                               | 2930                                                                                                                                                                                                                                                                                                                                                                                                                                                                                                                                                                                                                                                                                                                                                                                                                                                                                                                                                                                                                                                                                                                                                                                                                                                                                                                                                                                                                                                                                                                                                                                                                                                                                                                                                                                                                                                                                                                                                                                               |                   |                                |  |      |        |    |     |     |    |     |     |    |     |     |    |     |     |    |     |     |    |     |     |    |     |     |    |     |     |    |      |      |    |      |      |    |      |      |    |      |      |    |      |      |    |      |      |    |      |      |    |      |      |    |      |      |    |      |      |    |      |      |    |      |      |    |      |      |    |      |      |    |      |      |

| Australia and New Zealand Antecedent Classification of Perinatal Mortality                                                                                                                                                                                                                                                                                                                                                                                                                                                                                                                                                                                                                                                                                                                                                                                                                                                                                                                                                                                                                                                                                                                                                                                                                                                                                                                                                                                                                                                                                                                                                                                                                                                                                                                                                                                                                                                                                                     |                                                                                                                                                                                                                                                                                                                                                                                                                                                                                                                                                                                                                                                                                                                                                                                                                                                                                                                                                                                                                                                                                                                                                                                                                                                                                                                                                                                                                                                                                                                                                                                                                                                                                                                                                                                                                                                                                                                                                                                                                                                                                                                                                                                                                                                                                                       |
|--------------------------------------------------------------------------------------------------------------------------------------------------------------------------------------------------------------------------------------------------------------------------------------------------------------------------------------------------------------------------------------------------------------------------------------------------------------------------------------------------------------------------------------------------------------------------------------------------------------------------------------------------------------------------------------------------------------------------------------------------------------------------------------------------------------------------------------------------------------------------------------------------------------------------------------------------------------------------------------------------------------------------------------------------------------------------------------------------------------------------------------------------------------------------------------------------------------------------------------------------------------------------------------------------------------------------------------------------------------------------------------------------------------------------------------------------------------------------------------------------------------------------------------------------------------------------------------------------------------------------------------------------------------------------------------------------------------------------------------------------------------------------------------------------------------------------------------------------------------------------------------------------------------------------------------------------------------------------------|-------------------------------------------------------------------------------------------------------------------------------------------------------------------------------------------------------------------------------------------------------------------------------------------------------------------------------------------------------------------------------------------------------------------------------------------------------------------------------------------------------------------------------------------------------------------------------------------------------------------------------------------------------------------------------------------------------------------------------------------------------------------------------------------------------------------------------------------------------------------------------------------------------------------------------------------------------------------------------------------------------------------------------------------------------------------------------------------------------------------------------------------------------------------------------------------------------------------------------------------------------------------------------------------------------------------------------------------------------------------------------------------------------------------------------------------------------------------------------------------------------------------------------------------------------------------------------------------------------------------------------------------------------------------------------------------------------------------------------------------------------------------------------------------------------------------------------------------------------------------------------------------------------------------------------------------------------------------------------------------------------------------------------------------------------------------------------------------------------------------------------------------------------------------------------------------------------------------------------------------------------------------------------------------------------|
| <p><b>1. Congenital abnormality</b><br/>(including termination of pregnancy for congenital abnormality)</p> <p>1.1 Central nervous system<br/>1.2 Cardiovascular system<br/>1.3 Urinary tract<br/>1.4 Gastrointestinal tract<br/>1.5 Chromosomal<br/>1.6 Metabolic<br/>1.7 Multiple<br/>1.8 Other<br/>1.9 Unspecified</p> <p><b>2. Perinatal infection</b></p> <p>2.1 Bacterial<br/>2.11 Group B Streptococcus<br/>2.12 E Coli<br/>2.13 Listeria Monocytogenes<br/>2.18 Other bacterial<br/>2.19 Unspecified bacterial</p> <p>2.2 Viral<br/>2.21 Cytomegalovirus<br/>2.22 Parvovirus<br/>2.23 Herpes simplex virus<br/>2.24 Rubella virus<br/>2.28 Other viral<br/>2.29 Unspecified viral</p> <p>2.3 Protozoal eg Toxoplasma<br/>2.4 Spirochaetal eg Syphilis<br/>2.5 Fungal<br/>2.6 Other<br/>2.7 Unspecified organism</p> <p><b>3. Hypertension</b></p> <p>3.1 Chronic hypertension: essential<br/>3.2 Chronic hypertension: secondary eg renal disease<br/>3.3 Chronic hypertension: unspecified<br/>3.4 Gestational hypertension<br/>3.5 Pre-eclampsia<br/>3.6 Pre-eclampsia superimposed on pre-existing hypertension<br/>3.7 Unspecified hypertension</p> <p><b>4. Antepartum haemorrhage</b></p> <p>4.1 Placental abruption<br/>4.2 Placenta praevia<br/>4.3 Vasa praevia<br/>4.8 Other APH<br/>4.9 APH of undetermined origin</p> <p><b>5. Maternal disease</b></p> <p>5.1 Termination of pregnancy (other than for fetal abnormality)<br/>5.2 Diabetes / gestational diabetes<br/>5.3 Maternal injury<br/>5.31 Accidental<br/>5.32 Non-accidental<br/>5.4 Maternal sepsis<br/>5.5 Other maternal conditions eg Lupus obstetric syndrome</p> <p><b>6. Specific perinatal conditions</b></p> <p>6.1 Twin-to-twin transfusion<br/>6.2 Fetomaternal haemorrhage<br/>6.3 Antepartum cord complications<br/>6.4 Uterine abnormality<br/>6.5 Birth trauma (typically &gt;24 weeks or &gt; 600 grams)<br/>6.6 Haemolytic disease<br/>6.7 Idiopathic hydrops<br/>6.8 Other</p> | <p><b>7. Hypoxic peripartum death (typically &gt; 24 weeks or &gt; 600 grams)</b></p> <p>7.1 With intrapartum complications<br/>7.11 Uterine rupture<br/>7.12 Cord prolapse<br/>7.13 Shoulder dystocia<br/>7.18 Other<br/>7.2 No intrapartum complications<br/>7.9 Unspecified hypoxic peripartum death</p> <p><b>8. Fetal growth restriction (FGR)</b></p> <p>8.1 With evidence of uteroplacental insufficiency eg significant infarction, acute atherosclerosis, maternal vascular thrombosis or maternal floor infarction<br/>8.2 With chronic villitis<br/>8.3 Without the above placental pathology<br/>8.4 No examination of placenta<br/>8.9 Unspecified FGR or not known whether placenta examined</p> <p><b>9. Spontaneous preterm</b></p> <p>9.1 Spontaneous preterm with intact membranes, or membrane rupture less than 24 hours before delivery,<br/>9.11 with chorioamnionitis<br/>9.12 without chorioamnionitis<br/>9.13 no examination of the placenta<br/>9.19 unspecified or not known whether placenta examined</p> <p>9.2 Spontaneous preterm with membrane rupture &gt;= 24 hours before delivery,<br/>9.21 with chorioamnionitis<br/>9.22 without chorioamnionitis<br/>9.23 no examination of the placenta<br/>9.29 unspecified or not known whether placenta examined</p> <p>9.3 Spontaneous preterm with membrane rupture of unknown duration before delivery,<br/>9.31 with chorioamnionitis<br/>9.32 without chorioamnionitis<br/>9.33 no examination of the placenta<br/>9.39 unspecified or not known whether placenta examined</p> <p><b>10. Unexplained antepartum death</b></p> <p>10.1 With evidence of uteroplacental insufficiency eg significant infarction, acute atherosclerosis, maternal vascular thrombosis or maternal floor infarction.<br/>10.2 With chronic villitis<br/>10.3 Without the above placental pathology<br/>10.4 No examination of placenta<br/>10.9 Unspecified unexplained antepartum death or not known whether placenta examined.</p> <p><b>11. No obstetric antecedent</b></p> <p>11.1 SIDS<br/>11.11 Consistent with SIDS<br/>11.12 Possible SIDS<br/>11.2 Postnatally acquired infection<br/>11.3 Accidental asphyxiation<br/>11.4 Other accident, poisoning or violence (postnatal)<br/>11.8 Other<br/>11.9 Unknown / Unexplained</p> |
